# Supplementary material
Source: Springer Nature journal article supplement (https://www.springermedizin.de/resource/supplementary/12881_2008_415_MOESM2_ESM.pdf/9450522)
Supplement: MOESM2 [file 9450522]

# Exon 7 Skipping

## Normal splicing

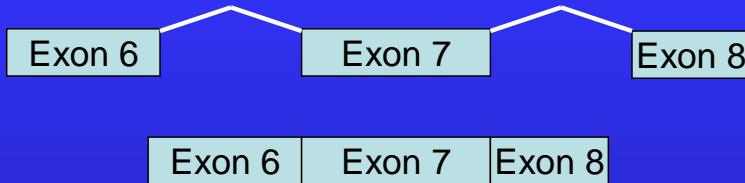

## Splicing defect

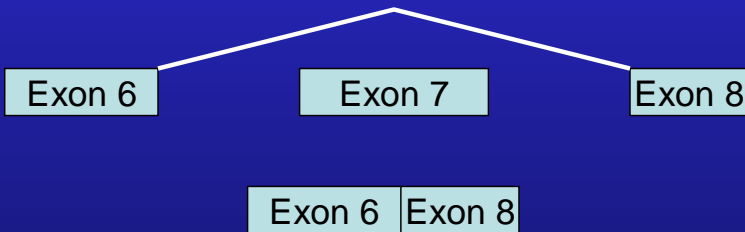

389bp →

212bp →

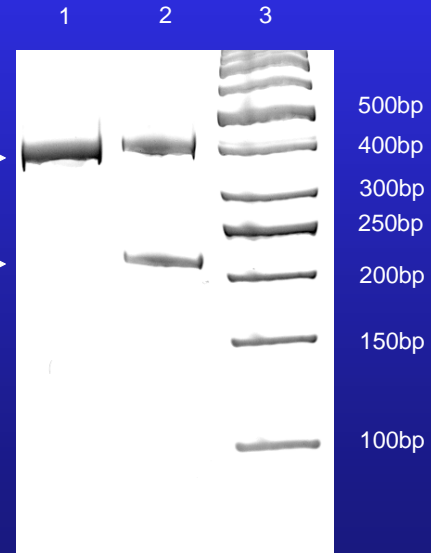

500bp

400bp

300bp

250bp

200bp

150bp

100bp

.....ATGCATTCTCCACAAGAGAACACTAAACTC.....
